# Supplementary material
Source: HighWire-hosted journal article supplement (http://www.jneurosci.org/highwire/filestream/599589/field_highwire_adjunct_files/0/Suppl._Table_I.pdf)
Supplement: Suppl._Table_I.pdf [file Suppl._Table_I.pdf]

Supplementary Table I. Quantification of TfR-GFP fluorescence in neurons over expressing PKD1-WT or KD.

| Groups        | Golgi region | Inner Dendrite | Middle Dendrite | Distal Dendrites |
|---------------|--------------|----------------|-----------------|------------------|
| PKD1-WT (4 h) | 1680±24      | 84±22          | 20±2            | ND               |
| PKD1-WT (6 h) | 1822±86      | 260±62         | 83±7            | 34±4             |
| PKD1-WT (8 h) | 2780±115     | 740±38         | 287±13          | 112±28           |
| PKD1-KD (4 h) | 1679±81      | 121±37         | 29±17           | ND               |
| PKD1-KD (6 h) | 1994±42      | 482±84         | 89±11           | 38±6             |
| PKD1-KD (8 h) | 2767±38      | 856±44         | 275±25          | 134±14           |

Values represent the average fluorescent intensity expressed in pixels within a 5-10  $\mu\text{m}^2$  area located in the central region of the Golgi apparatus or the inner, middle, and distal segment of the largest and thicker dendrite of each of the neurons analyzed. 12-Bits images were used for this quantification. Scale: 0 (black)-4095 (white). Values observed in control non-transfected or mock-transfected cells were similar to those shown here for PKD1 transfected neurons.

Each value is the mean±S.E.M. 30 transfected cells were analyzed for each time point and experimental condition.

For this experiment cultured hippocampal pyramidal neurons (8-10 d.i.v.) were transfected with TfR-GFP + PKD1-WT or -KD, and fixed at different time intervals (4, 6 and 8 hours) post-transfection. 2  $\mu\text{g}$  of each cDNA were used for this experiment.

ND: Not Determined.
